# Supplementary material for: Temperature-Dependent Solid-State NMR Proton Chemical-Shift Values and Hydrogen Bonding
Source: PubMed Central journal article supplement — J Phys Chem B. 2021 Jun 7;125(23):6222–30. doi: 10.1021/acs.jpcb.1c04061 (PMC8215646; doi:10.1021/acs.jpcb.1c04061), 2021-06-07
Supplement: jp1c04061_si_001.pdf [file jp1c04061_si_001.pdf]

# Supplementary Materials Section

## for

# Temperature-dependent Solid-state NMR Proton Chemical-shift Values and Hydrogen Bonding

Alexander A. Malär<sup>a,#</sup>, Laura A. Völker<sup>a,#</sup>, Riccardo Cadalbert<sup>a</sup>, Lauriane Lecoq<sup>b</sup>, Matthias Ernst<sup>a</sup>, Anja Böckmann<sup>b</sup>, Beat H. Meier<sup>a,\*</sup> and Thomas Wiegand<sup>a,\*</sup>

<sup>a</sup> *Physical Chemistry, ETH Zurich, 8093 Zurich, Switzerland*

<sup>b</sup> *Molecular Microbiology and Structural Biochemistry UMR 5086 CNRS/Université de Lyon, Labex Ecofect, 69367 Lyon, France*

#: Both authors contributed equally.

Corresponding authors: beme@ethz.ch, thomas.wiegand@phys.chem.ethz.ch

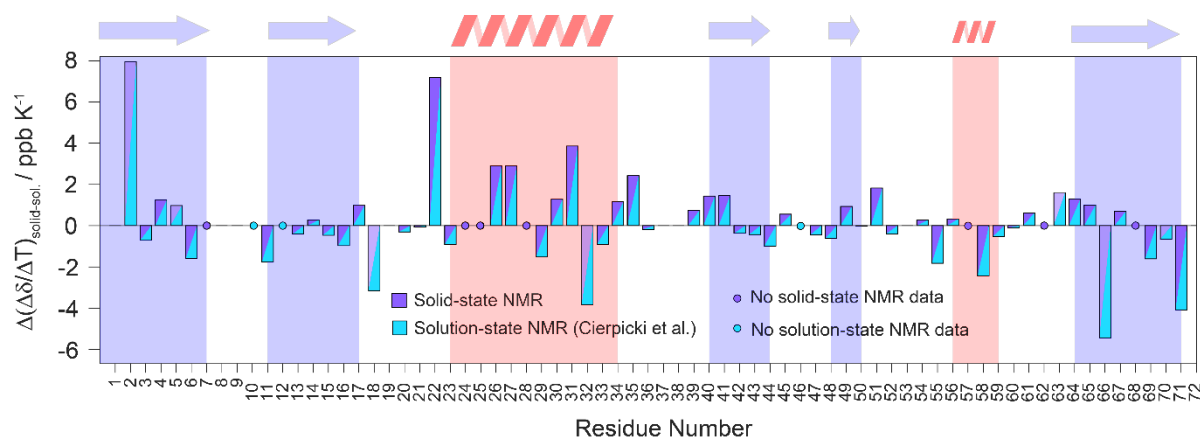

**Figure S1:** Differences in temperature coefficients between the solid and solution-state data shown in Figure 7.

**(a)  $\Delta\delta/\Delta T$  from solid-state NMR**      **(b)  $\Delta\delta/\Delta T$  from solution-state NMR**

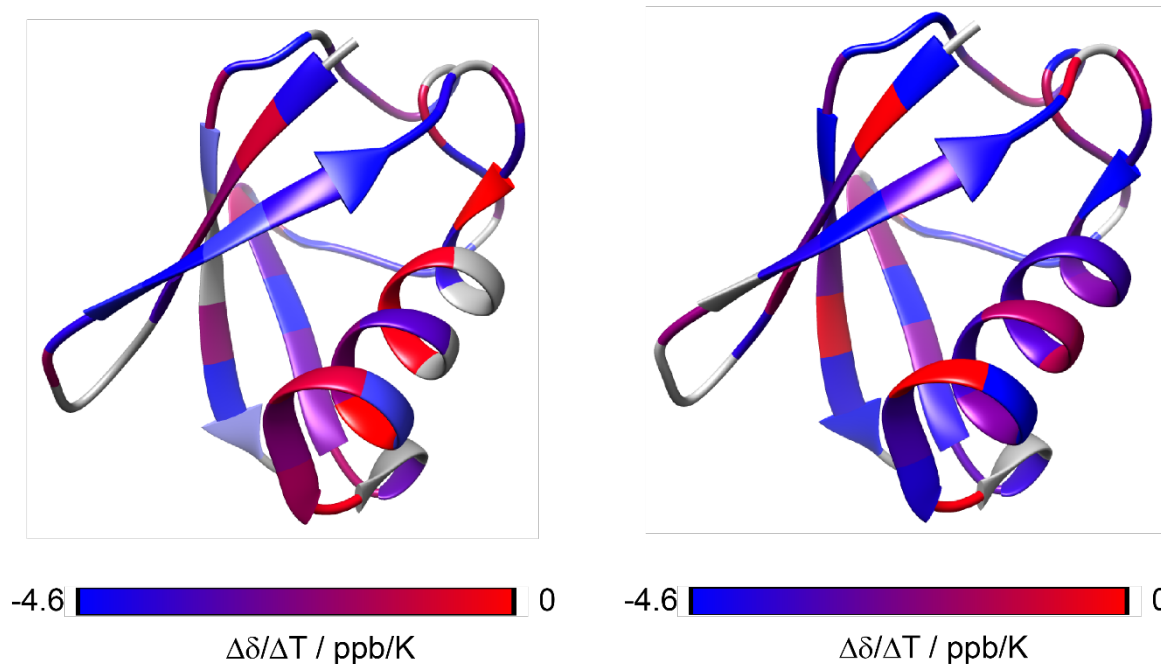

**Figure S2:** Plot of the temperature coefficients on the PDB structure as determined from solid-state or solution-state NMR, respectively. Solution-state NMR data were taken from reference [1].

### Reference

1. Cierpicki, T.; Zhukov, I.; Byrd, R. A.; Otlewski, J., Hydrogen Bonds in Human Ubiquitin Reflected in Temperature Coefficients of Amide Protons. *J. Magn. Reson.* **2002**, 157, (2), 178-180.
